# Supplementary material
Source: PubMed Central journal article supplement (PMC8149369)
Supplement: mmc1.pdf [file mmc1.pdf]

**Cell Reports Medicine, Volume 2**

**Supplemental information**

**BNT162b2 vaccination effectively prevents  
the rapid rise of SARS-CoV-2 variant B.1.1.7  
in high-risk populations in Israel**

**Ariel Munitz, Matan Yechezkel, Yoav Dickstein, Dan Yamin, and Motti Gerlic**

## Supplemental Figure

A.

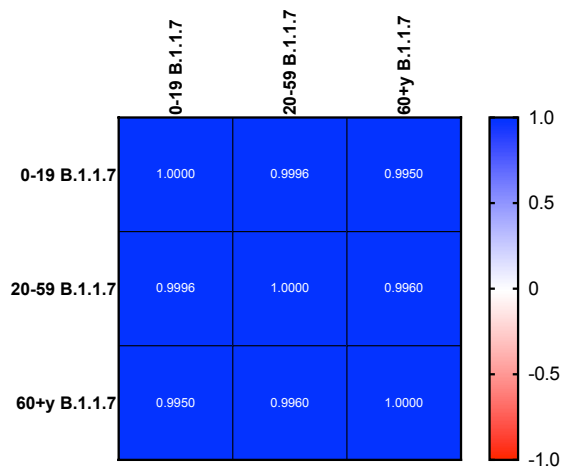

B.

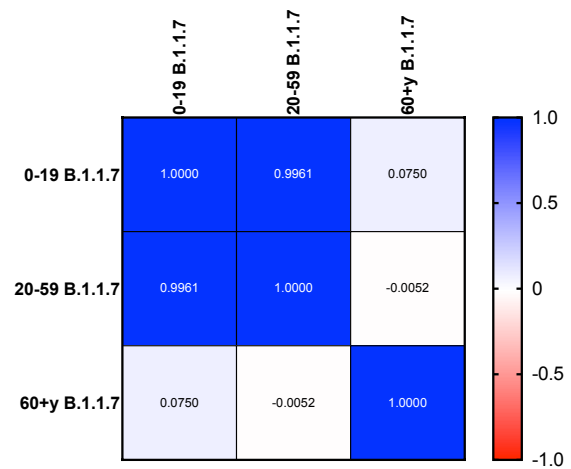

C.

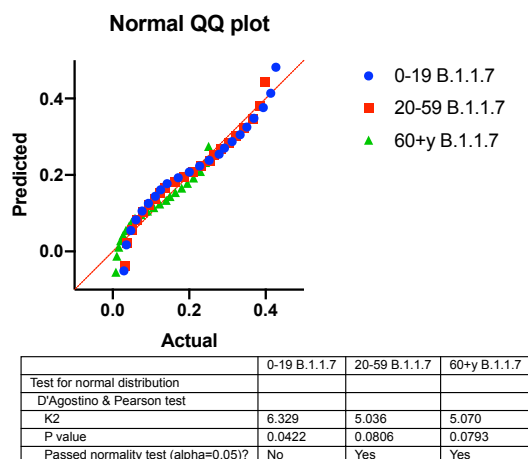

D.

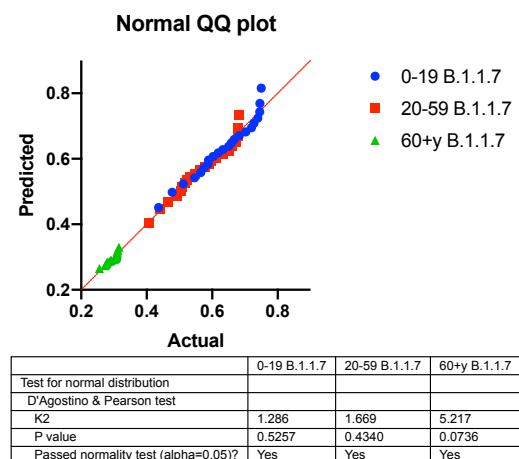

**Figure S1 (Related to Figure 1D).** Pearson correlation analysis (A, B) and Normal QQ plot and D'Agostino & Pearson normality distribution test (C, D.) related to Figure 1D. (A, C) December 24, 2020 until January 13, 2021; (B, D) January 13 until February 7, 2021. Data are from analysis of ~300,000 individual samples and were calculated using GraphPad Prism 9; Correlation analysis was performed using a Pearson correlation coefficient test (two-tailed, 95% confidence); r values are shown.
